# Supplementary material for: Extraction of Transcript Diversity from Scientific Literature
Source: PubMed Central journal article supplement (PMC1183516; doi:10.1371/journal.pcbi.0010010), 2005-06-24
Supplement: pcbi.0010010.sg003.pdf [file pcbi.0010010.sg003.pdf]

### Supplementary figure 3

#### Figure 3a Category 1

1. The [NAALADase/PSMA1]<sub>1</sub> gene is known to produce multiple [mRNA splice forms]<sub>2</sub> ([PSMA1a and PSMA1b]<sub>1</sub>).
2. It had been assumed that the [human]<sub>3</sub> [brain and prostate]<sub>4</sub> express transcript variants of the enzyme generated by [differential promoter usage]<sub>2</sub>.
3. One of these genes encodes [two]<sub>6</sub> different enzyme forms, alpha and beta, due to [the differential usage of first exons]<sub>2</sub>.
4. The newly defined region contains [an intron that may be alternatively spliced and seven polyadenylation signal sequences]<sub>2</sub>.
5. [EDNRDelta3]<sub>1</sub> generates the same amino acid sequence at the C terminus, but utilizes [the polyadenylation signal within the open reading frame]<sub>2</sub>, resulting [in a shorter 3' UTR]<sub>5</sub>.
6. The larger clone has 5' and 3' ends that are identical to the smaller clone but also has [an alternatively spliced 1.9-kilobase internal segment]<sub>2</sub>.

#### Category 2

7. A [HPFK-M]<sub>1</sub> cDNA clone lacking [the sequences corresponding to exon IX]<sub>5</sub> was isolated from [human]<sub>3</sub> [fibroblast]<sub>4</sub> (IMR-90) library, suggesting that [HPFK-M]<sub>1</sub> transcript may be [alternatively spliced]<sub>2</sub>.
8. Soluble [Fc gamma receptors]<sub>1</sub> are produced by [cleavage of the membrane receptors or by alternative splicing]<sub>2</sub>.
9. [Northern hybridization analysis and RT-PCR]<sub>7</sub> suggests that the soluble and membrane bound forms of [human]<sub>3</sub> [AmP]<sub>1</sub> are products of [twodistinct genes or, through alternative splicing]<sub>3</sub>, have different [C-terminal sequences]<sub>5</sub>.

#### Category 3

10. In this study, we have identified [three]<sub>6</sub> [Skn-1]<sub>1</sub> isoforms, which encode [peptides with various N termini]<sub>5</sub>.
11. These [two]<sub>6</sub> [hRPB3]<sub>1</sub> mRNA species differed in [3' UTR region length]<sub>5</sub>, the longer transcript containing the AU-rich sequence motif that mediates mRNA degradation.
12. If this question is correct, the observed differences in [amino acid sequences]<sub>5</sub> could be explained by the existence of different mRNAs for gamma and gamma' chains.

13. [Northern blot analysis]<sub>7</sub> detected 2.4 kb and 3.2 kb mRNA transcripts in all tissues examined.
14. [Gene expression analysis using cph genomic fragments from normal and neoplastic cells]<sub>7</sub> identifies a number of transcripts including a major mRNA of 2.5 kb as well as several smaller transcripts.
15. There were [tissue-specific]<sub>8</sub> differences in the size of mRNA transcripts in [human]<sub>3</sub> [brain]<sub>4</sub> tissues as well.
16. All [six]<sub>6</sub> mRNAs were present in the samples analyzed.

figure 3b

17. A G to T mutation in exon 6 results in an in-frame termination codon in eight Hispanic patients from Colorado and New Mexico.
18. Northern analysis and RT-PCR detected aberrant splicing and mutations of TEG101 in human breast cancer cell lines.
19. We report on molecular cloning of a novel human cDNA by its interaction with the splice factor SRp30c in a yeast two-hybrid screen.
20. All exon-intron boundaries agree with GT-AG rule.
21. Using RT-PCR analysis, we show that human 20alpha-HSD, and PGFS mRNAs express ubiquitously, while DD4 mRNA is restricted to the liver.
22. Regions of strong divergence between chicken fast C-protein and human slow C-protein may represent differences in C-protein isoforms.
23. Identification of I-plastin, a human fimbrin isoform that is expressed in intestine and kidney.
