# Supplementary material for: Extraction of Transcript Diversity from Scientific Literature
Source: PLoS Comput Biol. 2005 Jun 24;1(1):e10. doi: 10.1371/journal.pcbi.0010010 (PMC1183516; doi:10.1371/journal.pcbi.0010010)
Supplement: Table S3 — (445 KB XLS). [file pcbi.0010010.st003.xls]

## Sheet: Sheet1
pubmed id	mechanism
10022522	alternative splicing
10022881	alternative splicing
10022919	alternative splicing
10022980	alternative splice
10024308	alternative splicing
10024665	alternative splicing
10024665	Alternative splicing
10025968	alternative splicing
10025968	Alternative splicing
10026216	alternative splicing
10026216	alternatively spliced
10029063	alternative splicing
10029063	alternatively spliced
10029598	alternatively spliced
10037712	alternative splicing
10037743	alternatively spliced
10037775	Alternative splice
10049528	alternative splicing
10049761	alternative splicing
10049781	alternative splicing
10051322	alternatively spliced
10051481	alternative splicing
10066255	alternatively spliced
10067980	alternative splicing
10068037	alternative splicing
10068206	alternative splicing
10068206	alternative splicing
10070158	alternatively spliced
10070159	alternatively spliced
10070159	alternatively spliced
10071762	alternatively spliced
10072426	alternatively spliced
10072426	alternatively spliced
10072757	alternatively spliced
10072759	alternative splicing
10072759	alternative splice
10072776	alternatively spliced
10074928	alternative splicing
10074928	alternatively spliced
10075722	alternative splicing
10079227	alternatively spliced
10080177	alternative splicing
10080180	alternative splicing
10082426	alternative splicing
10082755	alternatively spliced
10085246	alternative splicing
10085246	alternatively spliced
10085256	alternate splicing
10088720	alternative splicing
10089900	the alternative splice product
10090730	alternative splicing
10090943	alternatively spliced
10091592	alternatively spliced
10092612	alternative splicing
10092647	alternative splicing
10092804	alternative splicing/polyadenylation
10094837	Alternatively spliced
10095098	alternatively spliced
10095110	alternatively spliced
10097130	alternative splicing
10097386	alternative splicing
10097389	alternative splicing
10097389	alternative splicing
10097389	alternative splicing
10098605	alternative splicing
10098969	alternative splicing
10098977	alternative splicing
10099711	alternative splicing
10102990	alternative splicing
10103062	alternate splice
10103073	alternative splicing
10188733	alternative splicing
10188733	Alternative splicing
10191046	Alternative splicing
10191058	alternative splicing
10194760	alternative splicing
10195698	alternative splicing
10195698	alternatively spliced
10195698	alternatively spliced
10196175	alternative splice
10196175	Alternative splicing
10196227	alternate splice product
10196474	alternate splice
10197529	alternative splicing
10197628	alternative splicing
10197638	alternatively spliced
10198212	alternative splicing
10199161	alternative splicing
10199161	alternative splicing
10199781	alternative splicing
10200536	alternatively spliced
10200560	alternatively spliced
10201920	alternately spliced
10201962	alternatively spliced
10202816	alternative splicing
10202816	alternative splicing
10203277	alternative splicing
10205169	alternatively spliced
10205169	alternatively spliced
10207053	alternative splicing
10209268	alternative splicing
10209495	alternatively spliced
10210672	alternative splice
10212397	alternative splicing
10213163	altered splicing
10214934	alternatively spliced
10214987	alternative splicing
10216099	alternatively spliced
10216218	alternative spliced
10216219	alternatively spliced
10216219	alternative splicing
10216219	alternative splicing
10216219	alternative splicing
10219088	Alternative splicing
10221337	alternative splicing
10222253	alternatively spliced
10224102	alternate splicing
10224138	Alternative splicing
10224138	alternatively spliced
10224256	alternative splicing
10226012	alternative splicing
10231026	alternative splicing
10231568	alternative splicing
10234454	Alternatively spliced
10234807	alternately spliced
10320352	alternative splice
10321243	alternative splicing
10321243	alternative splicing
10321802	alternate splicing
10322913	Alternative splicing
10325432	alternatively spliced
10328932	alternative splicing
10328932	alternative splicing
10329007	alternative splicing
10329007	alternative splicing
10329971	alternative splicing
10330042	Alternative splicing
10330110	alternatively spliced
10330140	alternatively spliced
10330455	alternatively spliced
10331645	alternative splicing
10331944	alternative splicing
10335660	alternative splicing
10336251	alternative splicing
10336464	alternative splicing
10340473	alternative splicing
10340741	alternative splicing
10340741	alternative splicing
10341097	alternative splicing
10341097	alternatively spliced
10342282	alternative splicing
10349860	alternative splicing
10352359	Alternative splicing
10357812	alternatively spliced
10357812	alternatively spliced
10358021	alternative splicing
10358070	alternatively spliced
10358070	alternatively spliced
10358070	alternative splicing
10358178	alternative splice/polyadenylation
10360763	alternative splicing
10360842	alternatively spliced
10361139	alternatively spliced
10362357	alternate splicing
10362683	alternatively spliced
10364190	alternative splicing
10364205	alternatively spliced
10366446	alternative splice
10366449	Alternative splicing
10366607	Alternative splicing
10366750	alternative splicing
10367375	Alternative splicing
10369162	alternative splicing
10371335	alternative splicing
10373021	Alternative splicing
10373452	alternative splicing
10373479	alternative splice
10373507	alternatively spliced
10375597	Alternative splicing
10376970	alternative splicing
10380879	Alternative splicing
10380879	alternative splicing
10381577	alternative splicing
10383434	alternative splicing
10383827	alternative splicing
10383941	alternative splicing
10384881	alternatively spliced
10386770	alternative splicing
10390617	alternative splicing
10391249	alternative splicing
10391991	alternative splicing
10395068	alternative splicing
10395068	alternative splicings
10395916	alternative splicing
10395931	alternatively spliced
10395931	alternatively spliced
10396062	Alternative splicing
10398309	alternatively spliced
10398309	alternative splice
10399028	alternatively spliced
10401006	alternative splicing
10401006	alternatively spliced
10402191	Alternatively spliced
10403190	alternatively spliced
10403795	alternative splicing
10403798	alternate splicing
10404027	alternative splicing
10405166	alternately spliced
10406956	alternative splicing
10407682	alternatively spliced
10409443	alternative splicing
10410384	alternative splicings
10411135	alternative splicing
10414303	alternative splicing
10414307	alternative splicing
10414307	alternatively spliced
10414388	alternatively spliced
10417349	alternative splicing
10418199	alternative splicing
10418199	alternative splicing
10419485	alternatively spliced
10419532	alternative splicing
10419560	alternative splicing
10420152	alternative splicing
10420152	alternative splicing
10421870	alternate splicing
10422878	alternatively spliced
10425280	alternative splicing
10425445	alternative splicing
10425450	alternative splicing
10430961	alternative splicing
10432294	alternatively spliced
10433800	alternatively spliced
10435630	alternative splicing
10438524	Alternative splicing
10441464	alternative splice
10441571	alternative splice
10442095	alternate splicing
10448191	alternative splicing
10449766	alternative splicing
10449920	alternative splicing
10449922	alternative splicing
10454147	alternative splicing
10454147	alternative splicing
10455305	Alternative splicing
10456178	alternative splicing
10458488	alternative splicing
10458488	alternative splicing
10459864	alternative splicing
10460236	alternative splicing
10461880	alternative splicing
10465263	alternatively spliced
10465263	alternatively splices
10465288	alternative splicing
10467032	alternative splicing
10467348	alternative splicing
10467422	alternative splicing
10469137	alternative splicing
10469245	alternative splicing
10470383	alternative splicing
10471312	alternatively spliced
10471737	alternative splicing
10471737	alternatively spliced
10471747	alternative splicing
10471807	alternative splicings
10475374	alternative splicing
10479681	Alternative splicing
10480395	alternate splicing
10482009	alternatively spliced
10488115	alternative splicing
10489101	alternatively spliced
10490961	alternative splice
10490997	alternatively spliced
10491188	alternatively spliced
10491205	alternatively spliced
10492128	alternatively spliced
10492398	Alternative splicing
10493923	alternatively spliced
10495442	alternative splice
10495884	alternative splicing
10498824	alternatively spliced
10501467	alternatively spliced
10501502	alternatively spliced
10505033	alternative splicing
10505116	alternative splicing
10506199	Alternative splicing
10506216	alternative splicing
10506588	alternative splicing
10510450	alternative spliced
10512748	alternative splicing
10512861	alternative splicing
10513898	alternative splicing
10514463	alternative splicing
10514463	alternative splicing
10514463	alternative splicing
10516175	alternatively spliced
10518217	alternative splicing
10520997	alternative splicing
10520997	alternative splicing
10521570	alternative splicing
10523623	alternative splicing
10523832	alternatively spliced
10523832	alternative splice
10523834	Alternate splicing
10524206	alternative splicing
10524215	alternative splicing
10524247	alternative splicing
10524247	Alternative splicing
10524247	Alternative splicing
10525148	alternative splicing
10525155	alternative splice
10525355	alternatively spliced
10526257	alternative splicing
10526318	alternatively spliced
10526318	alternatively spliced
10527426	alternative splicing
10527426	alternatively spliced
10527886	alternatively spliced
10527891	alternatively spliced
10529400	alternative splicing
10531593	Alternative splicing
10533041	alternative splicing
10533574	alternative splicing
10534405	alternatively spliced
10534768	alternative splicing
10536370	alternative splicing
10537049	alternative splicing
10537049	alternative splicing
10540361	alternative splice
10541865	Alternative splicing
10542077	alternatively spliced
10544017	alternative splicing
10544017	alternative spliced
10544135	Alternative splice
10545160	alternatively spliced
10545160	Alternative splicing
10548410	Alternative splicing
10548410	alternative splicing
10548732	alternative splicing
10550218	alternative splicing
10550218	alternative splicing
10550218	alternative splicing
10550312	alternative splicing
10550742	alternatively spliced
10551104	alternative splicing
10551104	alternative splicing
10551358	alternative splicing
10551880	alternatively spliced
10551880	alternative splicing
10552932	alternatively spliced
10552956	alternatively spliced
10552956	alternative splicing
10552956	alternative splicing
10553022	alternative splicing
10553054	alternatively spliced
10553499	alternatively spliced
10554802	alternative splicing
10555761	alternate splice
10556281	alternative splicing
10556313	alternatively spliced
10556429	alternatively spliced
10556814	alternative splicing
10562580	alternative splicing
10564280	alternative splice
10564809	alternative splicing
10564809	alternatively spliced
10564811	Alternative splicing
10564811	alternatively spliced
10564814	alternative splicing
10566686	alternative splicing
10567551	alternative splicing
10570044	alternative splicing
10570929	alternative splicing
10570929	alternative splicing
10570976	Alternative splicing
10570976	alternatively spliced
10574949	alternatively spliced
10575008	alternative splicing
10576592	Alternative splicing
10576592	alternative splicing
10580159	alternative splicing
10580159	alternatively spliced
10581174	alternative splicing
10581401	alternative splicing
10581401	alternative splicing
10583162	alternatively spliced
10583508	alternative splicing
10585259	alternative splicing
10585779	alternatively spliced
10585779	alternative splicing
10590230	alternatively spliced
10590262	alternative splicing
10591586	alternatively spliced
10592252	alternatively spliced
10592252	alternative splicing
10594240	Alternate splice
10594240	alternate splicing
10594240	Alternative splicing
10594644	alternative splicing
10597221	alternative splicing
10597312	alternate splicing
10597319	alternate splice
10601355	alternatively spliced
10602422	alternative splicing
10602422	alternatively spliced
10602992	alternative splicing
10602992	alternative splicing
10603166	alternative splicing
10603166	alternative splicing
10603983	alternative splicing
10604954	alternate splicing
10605820	alternative splicing
10605820	alternative splicing
10605820	alternative splicing
10605820	alternatively spliced
10606636	alternative splicing
10606894	alternative splicing
10607517	alternative splice
10607706	alternatively spliced
10607840	alternatively spliced
10607896	alternative splicing
10607900	alternately spliced
10607904	alternatively spliced
10608880	alternatively spliced
10611074	alternatively spliced
10611074	alternatively spliced
10611074	alternative splicing
10611074	alternative splicing
10611075	alternatively spliced
10611075	alternatively spliced
10611380	Alternative splicing
10613906	Alternative splicing
10615049	alternative splicing
10615950	alternative splice
10617769	alternatively spliced
10618495	alternative splicing
10618710	alternative splicing
10619023	Alternative splicing
10619136	alternative splicing
10619396	alternative splicing
10619662	alternative splicing
10619662	alternative splicing
10620327	alternatively spliced
10620614	alternative splicing
10620614	alternative splicing
10623517	alternative splicing
10623618	alternative splicings
10623859	alternative splicing
10624822	Alternative splicing
10624822	alternative splicing
10625438	Alternative splicing
10625616	alternatively spliced
10625662	alternatively spliced
10625670	alternatively spliced
10625688	alternate splicing
10626010	alternatively spliced
10626660	alternative splicing
10627481	Alternative splicing
10627481	Alternative splicing
10628535	alternatively spliced
10629546	alternatively spliced
10630295	alternative splicing
10630415	alternative splicing
10632569	alternative splicing
10633261	alternatively spliced
10639739	alternative splicing
10640678	alternative splicing
10642451	alternately spliced
10642451	alternative splicing
10642497	alternatively spliced
10642500	alternative splicing
10644456	alternative splice
10644679	alternatively spliced
10644679	alternatively spliced
10644713	alternatively spliced
10644717	alternatively spliced
10646126	alternative splicing
10646499	alternatively spliced
10646869	alternative splicing
10648785	alternatively spliced
10648811	alternative splicing
10648899	alternative splicing
10652311	alternative splicing
10652422	alternate splicing
10653696	alternative splicing
10654915	alternative splicing
10656923	alternative splicing
10657632	alternative splicing
10657951	alternative splicing
10660601	alternative splice
10660669	alternative splicing
10662809	alternatively spliced
10666210	alternatively spliced
10666227	alternatively spliced
10667569	alternate splicing
10668647	alternatively spliced
10668961	Alternative splicing
10670426	alternative splice
10671298	alternatively spliced
10671565	Alternative splicing
10675044	alternative cis-splicing
10675623	alternate splicing
10677560	alternatively spliced
10677588	alternative splicing
10679207	alternative splicing
10679207	alternative splicing
10679301	alternative splicing
10681527	alternative splicing
10681589	alternate splicing
10682855	alternatively spliced
10684595	Alternative splicing
10684924	alternative splicing
10684946	alternatively spliced
10684946	alternative splicing
10686151	alternative splicing
10687307	alternative splicing
10689111	alternativeley spliced
10692103	alternative splicing
10692556	alternative splicing
10694938	alternative splicing
10697248	alternative splicing
10697248	alternative splice
10698202	alternative splicing
10698300	alternative splicing
10698334	alternative splicing
10699184	alternatively spliced
10701763	alternative splicing
10701778	alternative splicing
10702241	alternatively spliced
10702253	alternative splicing
10704491	alternative splicing
10704491	alternative splicing
10706707	alternative splicing
10706707	alternative splicing
10708526	Alternative splicing
10708868	alternative splicing
10709093	alternative splicing
10709758	alternative splicing
10711706	alternative splicing
10711811	alternatively spliced
10713103	alternate splicing
10713907	alternative splicing
10716699	alternatively spliced
10717475	alternative splice
10717478	alternative splicing
10718196	alternative splicing
10718196	alternative splicing
10719357	alternative splicing
10719879	alternative splicing
10719891	alternative splicing
10722741	alternative splicing
10722878	alternative splicing
10723727	alternatively spliced
10727079	alternative splicing
10729146	alternative splicing
10729335	alternative spliced
10729790	alternatively spliced
10733566	alternatively spliced
10733677	alternative splicing
10733679	alternative splicing
10734188	Alternative splicing
10734266	alternatively spliced
10734266	alternative splicing
10734266	alternatively spliced
10735273	alternatively spliced
10737634	alternative splicing
10739682	alternatively spliced
10740297	alternatively spliced
10741467	alternative splicing
10741467	alternative splicing
10742092	alternative splicing
10747030	alternative splicing
10749675	alternatively spliced
10749941	alternate splicing
10751326	alternative spliced
10751411	alternate splicing
10752525	alternatively spliced
10753970	alternatively spliced
10756092	alternative splicing
10756092	alternatively spliced
10756095	alternatively spliced
10756098	alternative splicing
10757121	Alternative splicing
10757789	altered splicing
10760602	Alternative splicing
10760602	alternatively spliced
10760606	alternative splicing
10760818	alternative splicing
10764754	alternative splicing
10766762	alternative splicing
10766825	alternatively spliced
10766825	alternative splicing
10767541	alternative splicing
10769024	alternative splicing
10769197	alternatively spliced
10770488	alternate splicing
10773664	alternative splicing
10775188	alternative splicing
10775435	alternative splicing
10777584	alternatively spliced
10777669	alternative splicing
10779344	alternative splicing
10779429	alternative splice
10779465	alternative splicing
10779586	alternatively spliced
10783263	alternative splicing
10783329	alternately spliced
10790390	alternative splicing
10790595	alternative splicing
10791918	alternative splicing
10792029	alternative splicing
10794709	alternatively spliced
10794722	alternative splicing
10797535	alternatively spliced
10799306	alternative splicing
10799889	alternative splicing
10800923	alternative splicing
10801275	alternatively spliced
10801275	alternatively spliced
10801861	alternative splicing
10804181	alternatively spliced
10805751	alternatively spliced
10806084	alternatively spliced
10806365	alternative splicing
10806390	alternatively spliced
10809003	alternative splicing
10810176	alternative splicing
10810295	alternative splicing
10811918	alternative splicing
10814524	alternative splicing
10814826	alternatively spliced
10814826	alternatively spliced
10814826	alternative splicing
10814826	alternative splicing
10814826	alternatively spliced
10816440	alternative splicing
10816440	alternatively spliced
10816663	alternatively spliced
10818230	alternative splicing
10818442	alternatively spliced
10819258	alternative splicing
10819506	alternatively spliced
10819783	alternative splice
10820146	alternative splicing
10821853	alternative splicing
10821853	alternatively spliced
10821861	Alternative splicing
10827155	alternative splicing
10828456	alternative splice
10828829	alternate splicing
10829067	alternative splicing
10829067	alternatively spliced
10829067	alternative splicing
10830168	alternative splicing
10831843	alternatively spliced
10832829	Alternative splicing
10841034	alternative splicing
10842078	alternative splicing
10842100	alternative splicing
10842355	alternative splicing
10845086	alternative splicing
10851236	alternatively spliced
10853270	alternative splicing
10854094	alternative splicing
10854099	alternative splicing
10854245	alternative splicing
10854245	Alternative splicing
10854432	alternatively spliced
10856503	alternative splicing
10858498	alternative splicing
10858537	alternatively spliced
10860579	alternative splicing
10860579	alternative splicing
10860582	alternatively spliced
10860811	alternatively spliced
10860845	alternative splicing
10860885	alternative splicing
10861241	alternative splicing
10861565	alternative splicing
10862111	alternative splicing
10862692	alternative splicing
10864934	Alternative splicing
10864934	Alternative splicing
10866112	alternative splicing
10866292	alternative splicing
10866662	alternatively spliced
10866835	alternative splicing
10866835	alternative splicing
10869340	alternative splicing
10869340	alternative splicing
10871603	alternatively spliced
10871603	alternatively spliced
10872874	alternative splicing
10878590	alternative splicing
10880057	alternatively spliced
10880128	alternatively spliced
10880692	Alternate splicing
10880964	alternative splice
10885562	alternative splice
10886327	alternatively spliced
10886507	alternative splicing
10889038	alternative splicing
10890176	alternative splicing
10890536	alternative splicing
10890557	alternative splicing
10893414	alternative splicing
10894800	alternative splice
10896954	alternative splicing
10896954	alternative splicing
10896954	alternative splicing
10896954	alternative splicing
10897001	alternative splicing
10899158	alternative splice
10900032	alternatively spliced
10900438	alternative splicing
10901444	alternatively spliced
10902923	alternative splicing
10903163	alternative splicing
10906393	alternative splicing
10907848	alternative splicing
10908306	alternatively spliced
10908306	alternative splice
10908315	alternative splice
10908348	alternative splicing
10908575	alternatively spliced
10908600	Alternative splicing
10910213	alternative splicing
10913331	alternative splicing
10917171	alternatively splicing
10917590	alternative splice
10917596	alternative splicing
10917878	alternatively spliced
10919072	alternative splicing
10919260	alternative splicing
10919662	alternative splice
10921894	alternative splicing
10921894	alternative splicing
10921916	alternatively spliced
10926776	alternately spliced
10926960	alternative splicing
10928214	alternative splicing
10928956	alternative splicing
10929067	alternative splicing
10930317	alternative splicing
10931525	Alternative splicing
10931847	alternative splicing
10933876	alternative splicing
10935472	alternative splicing
10935886	alternative splicing
10936215	alternative splicing
10940553	alternatively spliced
10942031	alternative splicing
10944462	alternatively spliced
10945639	alternatively spliced
10950922	alternative splicing
10950932	alternatively spliced
10950938	alternatively spliced
10951563	alternatively spliced
10952987	alternative splicing
10955775	alternative splicing
10955905	alternatively spliced
10956549	alternatively spliced
10960499	alternatively spliced
10963991	alternative splicing
10964513	alternative splicing
10964717	Alternative splicing
10964717	alternative splicing
10965907	alternative splicing
10967131	alternative splicing
10970098	alternative splicing
10970282	alternative splicing
10970881	alternatively spliced
10970881	alternative splicing
10971520	alternative splicing
10972305	alternative splicing
10973317	alternative splicing
10973616	alternative splicing
10973807	alternative splicing
10973922	alternatively spliced
10973969	alternative splicing
10975807	alternative splicing
10978502	alternative splicing
10982855	Alternative splicing
10984311	Alternative splicing
10984311	alternative splicing
10984438	alternatively spliced
10984475	alternatively spliced
10984475	alternatively spliced
10984521	alternatively spliced
10984521	Alternative splicing
10984521	alternative splicing
10984613	alternatively spliced
10987684	alternate splicing
10990374	alternatively spliced
10992418	alternative splicing
10995577	alternatively splice
10995766	alternative splicing
10997588	Alternative splicing
10997591	alternative splicing
10997591	alternative splicing
10998642	Alternative splicing
10999545	alternative splicing
11000288	alternative splicing
11000475	alternative splicing
11000481	alternative splicing
11000526	alternative splicing
11005243	alternative splicing
11006081	alternatively spliced
11006096	alternative splicing
11006096	Alternative splicing
11006236	alternative splicing
11007769	alternatively spliced
11007769	alternatively spliced
11008484	alternative splicing
11010966	alternatively spliced
11010971	alternative splicing
11012224	alternatively spliced
11012227	alternatively spliced
11013079	alternative splicing
11013080	alternative splicing
11013431	alternative splicing
11015561	alternative splicing
11016933	alternative splicing
11018256	alternative splicing
11021528	alternatively spliced
11024281	alternative splicing
11024282	alternative splicing
11024282	alternative splicing
11024286	alternative splicing
11027215	alternative splicing
11027290	alternative splicing
11027290	alternatively spliced
11027290	alternative splicing
11029047	alternative splicing
11029150	alternatively spliced
11030746	alternative splicing
11031265	alternative spliced
11033343	alternative spliced
11035015	alternatively spliced
11038253	alternatively spliced
11038365	alternative splicing
11039726	Alternative splicing
11039726	alternatively spliced
11042189	alternatively spliced
11042206	alternatively spliced
11042206	alternatively spliced
11042343	alternative splicing
11042343	alternatively spliced
11043772	alternatively spliced
11044730	alternatively spliced
11044730	alternatively spliced
11046012	alternatively spliced
11046130	alternative splicing
11050227	alternate splicing
11050227	alternate splicing
11050470	alternative splicing
11052810	alternatively spliced
11054064	alternative splicing
11054530	alternatively spliced
11054530	alternative splicing
11060020	alternative splicing
11060238	alternative splicing
11060465	alternatively spliced
11061286	alternatively spliced
11062023	alternative splicing
11063691	alternative splicing
11066075	alternatively spliced
11069204	alternatively spliced
11069585	alternative splice
11069705	Alternative splicing
11069897	alternatively RNA-spliced
11069937	alternative splicing
11070061	alternative splicing
11070061	alternatively spliced
11070091	alternative splicing
11070091	alternative splicing
11071908	alternatively spliced
11071909	alternative splicing
11071909	Alternative splicing
11073717	alternately spliced
11073717	alternate splicing
11075717	alternative splicing
11078877	alternative splicing
11080599	alternative splicing
11081623	alternative splicing
11083919	alternative splicing
11085878	alternatively spliced
11085878	alternative splicing
11085940	alternatively spliced
11085940	alternative splicing
11085940	alternatively spliced
11085940	alternative splicing
11086001	alternative splicing
11087997	alternative splicing
11089973	alternative splicing
11091307	alternative splicing
11092761	alternative splicing
11097842	alternatively spliced
11098058	alternative splicing
11098058	Alternative splicing
11098058	Alternative splicing
11098058	alternative splicing
11098141	alternative splicing
11102543	alternatively spliced
11102543	alternatively spliced
11102837	alternative splicing
11102837	alternative splicing
11104669	alternatively spliced
11106244	alternatively spliced
11108721	alternative splice
11111833	alternatively spliced
11112347	alternatively spliced
11112355	alternatively spliced
11113127	alternatively spliced
11115766	alternatively spliced
11115844	alternative splicing
11116135	alternative splicing
11118492	alternative splicing
11118492	alternative splicing
11118617	alternative splicing
11118645	alternatively spliced
11119250	alternatively spliced
11119696	Alternative splicing
11121039	alternative splicing
11121057	alternatively spliced
11121297	alternatively spliced
11121297	Alternative splicing
11121398	alternatively spliced
11121587	alternatively spliced
11124542	Alternative splicing
11124863	alternative spliced
11125105	alternatively spliced
11126233	alternate splicing
11132156	alternative splice
11132158	alternatively spliced
11132701	alternative splicing
11133237	alternative splicing
11134055	alternative splicing
11134361	alternatively spliced
11139140	alternatively spliced
11139503	Alternative splicing
11139507	Alternative splicing
11143982	alternative splicing
11145988	alternatively spliced
11146110	alternatively spliced
11146121	alternative splicing
11146121	alternatively spliced
11157858	alternative splice
11158320	alternative splicing
11159367	alternatively spliced
11161465	alternative splicing
11161788	alternative splicing
11161820	alternative splicing
11162434	alternatively spliced
11162524	alternative splicing
11162608	alternative splicing
11162656	alternatively spliced
11163313	alternatively spliced
11163362	Alternative splice
11163362	alternative splicing
11163867	alternative splice
11165245	alternatively spliced
11165245	alternative splicing
11165479	alternative splicing
11165479	alternatively spliced
11165938	alternatively spliced
11167022	alternative splicing
11167023	alternative splicing
11167023	alternative splice
11167023	alternative splicing
11168366	alternative splicing
11170144	alternative splicing
11170285	alternative splicing
11170754	alternative splicing
11172023	alternative splicing
11172136	alternatively spliced
11173120	alternatively spliced
11173120	Alternative splicing
11173120	alternative splicing
11173120	Alternative splicing
11173273	alternative splicing
11173852	alternatively spliced
11174854	alternative splicing
11176557	alternative splicing
11179670	alternative splicing
11179820	alternative splicing
11179820	Alternative splicing
11179996	alternative splicing
11180116	Alternative splicing
11180116	alternative splicing
11180951	alternatively spliced
11181066	alternatively spliced
11189379	alternative splice
11191110	alternate splicing
11191110	alternate splicing
11191348	alternatively spliced
11196687	alternatively spliced
11206135	alternative splicing
11208025	alternatively spliced
11209055	alternative splicing
11210185	Alternative splicing
11210189	alternatively spliced
11212919	alternatively spliced
11212919	alternative splicing
11222021	Alternative splicing
11222021	alternative splicing
11222021	alternative splicing
11222913	alternative splicing
11223124	Alternative splicing
11223124	alternative splicing
11223124	alternative splicing
11223851	alternatively spliced
11225873	alternative splicing
11226226	alternative splicing
11226707	Alternative splicing
11226707	Alternative splicing
11230508	alternative splicing
11230508	Alternative splicing
11230508	alternative splicing
11231079	alternative splicing
11234381	alternative splicing
11238105	alternatively spliced
11238844	alternatively spliced
11238844	alternatively spliced
11239462	alternative splicing
11239462	alternative splicing
11239462	alternative splicing
11239462	alternative splicing
11241829	alternative splicing
11243884	alternative splicing
11244090	alternatively spliced
11245423	alternatively spliced
11245921	alternative splicing
11245985	alternative splice
11245987	alternative splicing
11246003	alternative splicing
11246003	alternative splicing
11247663	alternatively spliced
11248059	alternative splicing
11248201	alternatively spliced
11250073	alternative splicing
11254714	alternative splicing
11257449	alternatively spliced
11258596	alternative splicing
11260074	alternative splicing
11261935	alternative splicing
11263972	alternative splicing
11264472	alternative splice
11266544	alternative splicing
11266544	alternatively spliced
11267699	alternatively spliced
11267908	alternative splicing
11267908	Alternative splicing
11267908	alternatively spliced
11267974	alternative splicing
11267974	alternatively spliced
11267974	alternate splicing
11274164	alternative splicing
11274164	alternative splicing
11274164	alternative splicing
11275257	alternate splice
11277076	alternative splice
11277561	alternative splicing
11278390	alternatively spliced
11278438	Alternative spliced
11278480	alternative splice
11279178	alternative splicing
11280922	alternative splicing
11281996	alternative splicing
11282967	alternative splicing
11283022	alternative splicing
11283284	alternatively spliced
11284713	alternative splicing
11284713	alternative splice
11285240	Alternative splicing
11287200	alternate splice
11287332	alternative splicing
11289059	alternative splicing
11289059	alternatively spliced
11289098	alternative splicing
11290427	alternative splicing
11290428	alternatively spliced
11290782	alternative splicing
11290834	alternative splice
11293328	Alternative splicing
11294845	alternative splicing
11294845	Alternative splicing
11297543	alternatively spliced
11305908	alternatively spliced
11305908	alternatively spliced
11305939	alternatively spliced
11306053	alternative splicing
11306808	alternative splicing
11307168	alternative splicing
11309345	alternative splicing
11310411	alternative splicing
11311944	alternative splicing
11311980	alternative splicing
11312109	alternative splicing
11312563	Alternative splicing
11312563	alternative splicing
11312563	alternative splicing
11313015	alternative splicing
11313744	alternative splicing
11313877	alternatively spliced
11313953	Alternative splicing
11317219	alternative splice
11318979	alternatively spliced
11321126	alternatively spliced
11323417	alternative splicing
11327755	Alternative splicing
11328871	alternative splicing
11330041	alternative splicing
11330041	alternative splicing
11331401	alternative splicing
11334053	alternatively spliced
11335940	alternative splicing
11336648	alternative splicing
11337265	alternate splice
11337357	alternative splicing
11337482	alternative splicing
11337487	alternative splicing
11339836	alternatively spliced
11342542	Alternative splicing
11342542	alternative splicing
11345517	alternative splicing
11347887	alternative splicing
11350127	alternative splicing
11352561	alternatively spliced
11352844	alternative splicing
11353074	Alternative splicing
11353075	alternative splicing
11354632	alternative splicing
11356048	alternative splicing
11356126	alternative splicing
11356148	alternative splicing
11356838	alternative splicing
11358849	alternatively spliced
11359793	alternative splicing
11359908	alternatively spliced
11360506	alternative splicing
11368179	alternative splicing
11368517	alternatively spliced
11368517	alternative splicing
11368902	alternative splicing
11368911	alternatively spliced
11370665	Alternative splicing
11370678	alternative spliced
11371513	alternative splicing
11373278	alternative splicing
11374908	alternatively spliced
11375445	Alternative splicing
11375512	alternately spliced
11375891	alternatively spliced
11376690	alternatively spliced
11376943	alternative splicing
11378582	alternative splicing
11378824	alternative splicing
11380701	altered splicing
11386757	alternative splice
11387038	alternative splice
11387038	alternative splicing
11388889	alternatively spliced
11395482	alternative splicing
11396631	alternatively spliced
11396637	alternative splicing
11399479	alternative splicing
11400158	alternatively spliced
11400158	alternatively spliced
11401296	Alternative splicing
11401535	alternative splicing
11401535	Alternative splicing
11403896	alternative splicing
11403955	alternate splicing
11404236	alternatively spliced
11407973	alternatively spliced
11407973	alternative splicing
11408953	alternatively spliced
11409877	alternative splice
11410165	alternative splicing
11410367	alternative splicing
11413234	alternative splicing
11414657	alternatively spliced
11414786	Alternative splicing
11418006	alternatively spliced
11419941	alternative splicing
11420691	Alternative splicing
11421360	alternative splicing
11421360	alternative splicing
11421360	alternatively spliced
11422508	alternative splicing
11423001	alternatively spliced
11423001	Alternatively spliced
11423534	alternate splicing
11431468	alternative splicing
11432748	Alternative splicing
11433032	alternative splice
11433032	alternative splicing
11435406	alternatively spliced
11435406	Alternative splicing
11438536	alternative splicing
11438655	alternative splicing
11438655	alternative splicing
11441017	alternatively spliced
11443354	alternatively spliced
11443354	alternative splicing
11443354	alternatively spliced
11443354	alternatively spliced
11448109	Alternative splicing
11452023	alternatively spliced
11454678	alternative splicing
11456223	alternatively spliced
11457664	alternate splicing
11458392	alternative splicing
11461155	alternative splicing
11463574	Alternative splicing
11463794	alternatively spliced
11465080	alternate splicing
11466562	alternative splicing
11470524	alternative splicing
11470878	alternative splicing
11472060	alternative splicing
11472070	alternatively spliced
11472837	alternative splice
11472837	alternative splicing
11476733	alternative splicing
11478849	alternatively spliced
11479134	alternative splicing
11479678	alternative splicing
11483366	alternatively spliced
11483366	alternatively spliced
11485198	alternative splicing
11485198	alternative splicing
11485308	alternative splicing
11486008	alternative splicing
11486033	alternative splicing
11486343	alternative splice
11494046	alternatively spliced
11498022	alternatively spliced
11500243	alternative splicing
11500243	Alternative splicing
11502067	alternative splicing
11502739	alternative splicing
11503184	alternative splicing
11506705	alternatively spliced
11509181	Alternative splicing
11509566	alternative splicing
11512661	alternative splicing
11513955	alternative spliced
11513955	alternative spliced
11516562	Alternative splicing
11517262	alternative splicing
11517262	alternative splicing
11517399	Alternative splicing
11518703	alternative splicing
11518764	alternatively spliced
11518808	alternative splicing
11520083	alternatively spliced
11521806	Alternative splicing
11522825	alternative splicing
11522953	Alternative splicing
11526108	Alternative splicing
11526108	alternative splice
11528118	alternative splice
11535407	alternative splicing
11535832	alternatively spliced
11537842	alternatively spliced
11539857	alternate splicing
11539857	alternate splicing
11543618	alternately spliced
11543631	alternative splicing
11544089	alternatively spliced
11544089	alternatively spliced
11546814	alternative splicing
11549012	alternative splicing
11549277	alternative splice
11551646	alternate splicing
11551826	alternative splicing
11553912	alternative splicing
11555406	alternatively spliced
11557746	Alternative splicing
11557757	alternative splicing
11557757	alternatively spliced
11559701	alternatively spliced
11562352	alternative splicing
11563553	alternatively spliced
11563837	alternatively spliced
11564702	alternative splicing
11565746	alternative splicing
11566511	alternate splicing
11566511	Alternate splicing
11567029	alternatively spliced
11568638	alternative splicing
11570820	alternatively spliced
11570962	alternate splicing
11571281	alternative spliced
11572082	Alternative splicing
11573950	alternative splicing
11573950	alternatively spliced
11574059	alternative splice
11574062	alternative splice
11574476	alternative splicing
11576996	alternative splicing
11578873	alternative splicing
11579202	alternative splicing
11581160	alternative splicing
11581160	alternative splicing
11583586	alternatively spliced
11593961	Alternative splicing
11595752	alternative splicing
11596057	alternate splicing
11600245	alternative splicing
11602352	alternative splicing
11606192	alternatively spliced
11606483	Alternative splicing
11606537	alternative splicing
11606537	alternative splicing
11606537	Alternative splicing
11606537	alternative splicing
11606569	alternatively spliced
11607664	alternatively spliced
11613364	Alternate splicing
11641683	alternative splicing
11642361	alternative splicing
11642408	alternative splicing
11669578	alternative splicing
11673274	alternative splicing
11675014	alternative spliced
11675018	alternative splicing
11675124	alternatively spliced
11675129	alternatively spliced
11675339	alternative splicing
11675468	alternatively spliced
11676537	alternative splicing
11677242	alternative splicing
11678848	alternative splicing
11680842	Alternative splicing
11680842	alternative splice
11683710	alternative splicing
11683997	alternative splicing
11686919	alternatively spliced
11687289	alternative splicing
11688999	alternative splicing
11690630	alternatively spliced
11691849	alternative splicing
11691860	alternative splicing
11698287	alternatively spliced
11700045	alternative splicing
11700060	alternative splicing
11700060	Alternative splicing
11702207	alternative splicing
11702207	alternative splice
11703080	alternatively spliced
11703504	alternatively spliced
11703504	alternative splicing
11703504	Alternative splicing
11704419	alternatively spliced
11706051	alternatively spliced
11707068	alternative splicing
11707391	alternatively spliced
11707391	alternative splicing
11707779	alternative splicing
11712086	alternative spliceforms
11715042	alternative splicing
11716465	alternatively spliced
11719064	alternative splicing
11719275	alternative splicing
11719522	alternative splicing
11719522	alternative splicing
11721375	alternative splicing
11721375	alternative splicing
11721375	alternative splicing
11722580	alternatively spliced
11725643	alternative splicing
11726285	alternative splicing
11730087	alternative splicing
11730918	alternatively spliced
11733143	alternatively spliced
11734204	alternative splicing
11734541	alternative splice
11735129	alternative splicing
11737861	alternative splicing
11737861	alternative splicing
11737861	alternative splicing
11738818	alternative splicing
11738825	alternative splicing
11741608	alternatively spliced
11741838	alternative splicing
11742531	Alternative splice
11742531	alternative splice
11743582	alternative splicing
11744166	alternatively spliced
11746780	alternative splicing
11750125	alternative splice
11750826	alternative splicing
11750916	alternatively spliced
11751603	alternative splicing
11751855	alternative splicings
11751855	alternative splicing
11752319	alternative splicing
11752390	Alternative splicing
11753382	alternative splice
11753382	alternative splicing
11753519	alternative splicing
11754000	alternatively spliced
11770884	alternatively spliced
11771642	alternative splice
11772106	alternatively spliced
11772357	alternatively spliced
11772393	alternative splice
11772395	Alternative splicing
11773626	alternative splicing
11777906	alternative splicing
11777994	alternatively spliced
11779188	alternative splicing
11779188	Alternative splicing
11779698	alternative splice
11780999	alternative splicing
11781338	alternatively spliced
11784699	alternative splicing
11784712	alternative splicing
11784724	alternative splicing
11786311	alternative splicing
11786385	alternative splicing
11788654	alternative splicing
11790304	alternative splicing
11796121	alternative splicing
11796718	alternative splice
11797097	alternative splicing
11799248	Alternative splicing
11801635	alternate splicing
11803732	alternative splicing
11804339	alternative splicing
11804778	alternative splicing
11804786	alternatively spliced
11809673	alternative splicing
11810268	alternative splicing
11811788	alternatively spliced
11814386	alternative splicing
11814686	alternatively spliced
11823052	alternative splicing
11825891	alternative splicing
11826309	alternative splicing
11827169	alternate splicing
11827253	alternatively spliced
11827459	alternative splicing
11827459	alternatively spliced
11829741	alternatively spliced
11832485	alternative splicing
11834499	alternatively spliced
11834499	alternative splicing
11841555	alternative splicing
11842111	alternative splicing
11842111	alternative splicing
11845288	alternative splicing
11846513	alternatively spliced
11850226	alternative splicing
11850827	Alternative splicing
11851943	alternatively spliced
11853668	Alternative splicing
11855928	alternatively spliced
11856867	alternatively spliced
11856884	alternatively spliced
11859969	alternatively spliced
11860601	alternatively spliced
11861407	alternatively spliced
11861774	alternative splicing
11863369	alternatively spliced
11864975	alternative splicing
11866441	alternative splicing
11868392	alternative splicing
11870066	alternatively spliced
11872202	alternatively spliced
11874461	alternative splicing
11875278	alternative splice
11875736	alternative splice
11875736	alternative splice
11876772	alternatively spliced
11876824	alternately spliced
11879639	Alternative splicing
11879639	alternative splicing
11880487	alternative splicing
11880487	Alternative splicing
11880487	alternative splicing
11880506	alternate splice
11883959	alternative splice
11884421	alternative splicing
11884540	alternatively spliced
11888890	alternative splicing
11889554	alternatively spliced
11890665	alternatively spliced
11891058	alternatively spliced
11891065	alternative splicing
11891227	alternative splice
11891227	alternative splice
11891650	alternatively spliced
11891768	alternative splice
11892094	alternatively spliced
11893082	alternative splicing
11895121	alternative splicing
11895477	alternative splicing
11896159	alternatively spliced
11896159	Alternative splicing
11896187	alternative splicing
11896199	alternative splicing
11897010	alternatively spliced
11897010	alternative splicing
11897384	alternative splicing
11901222	alternative splicing
11902672	alternative splice
11902672	alternative splicing
11903040	alternative splicing
11906208	alternative splicing
11906971	alternatively spliced
11910005	alternative splicing
11911940	alternative splicing
11912163	alternative splicing
11913788	alternative splicing
11913788	alternatively spliced
11916166	alternative splicing
11916857	alternative splicing
11917126	alternative splicing
11917126	alternative splicing
11917126	alternative splicing
11918973	alternatively spliced
11918973	Alternative splicing
11918973	alternatively spliced
11920614	alternative splicing
11921278	alternatively spliced
11927836	alternative splicing
11931754	alternative splicing
11931768	alternatively spliced
11932019	alternative splicing
11932019	Alternative splicing
11934264	alternative splicing
11934525	alternately spliced
11934745	alternative splicing
11941317	alternative splicing
11943482	alternatively spliced
11943484	alternatively spliced
11944992	alternative splicing
11948657	alternative splicing
11950982	alternatively spliced
11952818	Alternate splicing
11955478	alternative splicing
11956964	alternative splicing
11959119	alternate splicing
11959693	alternatively spliced
11965550	alternative splicing
11968838	alternative splicing
11969286	alternative splicing
11971131	Alternative splicing
11972298	alternate splice
11973307	alternative splicing
11973307	Alternative splicing
11975983	alternative splicing
11978662	alternatively spliced
11980909	alternatively spliced
11983873	alternatively spliced
11983873	alternatively spliced
11985543	alternative splicing
11986224	alternative splicing
11986736	alternatively spliced
11988086	alternative splicing
11988318	alternatively spliced
11991046	alternative splice
11991046	alternative splicing
11997091	alternatively spliced
11997377	alternative splicing
12000837	alternatively spliced
12001065	alternatively spliced
12002314	alternately spliced
12002314	alternative splicing
12007838	alternatively spliced
12009329	alternative splicing
12009782	alternatively spliced
12009782	alternatively spliced
12010809	alternative splicing
12011094	alternative splicing
12011449	alternate splice
12012785	alternative splicing
12015418	alternatively spliced
12022233	alternative splicing
12022233	alternative splicing
12023119	alternative splicing
12023866	alternative splicing
12024052	alternative splicing
12027012	alternative splicing
12031412	alternative splicing
12031495	alternative splicing
12031495	alternative splicing
12031702	alternative splicing
12032350	alternative splicing
12032866	alternative splicing
12036289	alternatively spliced
12036587	alternative splicing
12036587	alternative splicing
12036595	alternative splice
12038625	alternatively spliced
12038625	Alternative splicing
12038625	alternative splicing
12038625	alternative splicing
12038983	alternative splicing
12039034	alternatively spliced
12039034	Alternative splicing
12039954	alternative splicing
12041728	alternative splicing
12044472	alternative splicing
12045191	alternative splicing
12045191	alternative splicing
12045191	alternative splicing
12049149	alternative splicing
12049771	alternatively spliced
12050238	alternative splicing
12051822	alternative splicing
12051969	Alternative splicing
12052236	alternative splicing
12054451	alternative splicing
12054497	alternatively spliced
12054525	alternative splicing
12054674	alternative splice
12056859	alternative splicing
12061236	alternative splicing
12062816	alternative splicing
12063395	Alternative splicing
12063395	alternative splicing
12063395	alternatively spliced
12064944	alternatively spliced
12065232	alternatively spliced
12065625	alternative splicing
12065666	alternative splicing
12067065	alternatively spliced
12067277	alternative splicing
12067718	alternatively spliced
12068077	alternative splicing
12071049	alternative splicing
12073145	alternatively spliced
12073145	alternative splicing
12073145	alternatively spliced
12077152	alternative splice
12079280	alternative splicing
12079287	alternative splicing
12081236	alternatively spliced
12083374	alternative splicing
12083780	alternatively spliced
12084454	alternative splicing
12084932	alternative splicing
12085347	alternate splicing
12086892	alternatively spliced
12088145	alternatively spliced
12088145	alternatively spliced
12088145	alternative splicing
12088145	alternatively spliced
12088145	alternatively spliced
12088861	alternative splicing
12088875	alternate splicing
12089365	alternatively spliced
12091387	alternatively spliced
12096916	alternative splicing
12097170	alternative splicing
12097342	alternative splicing
12099693	alternative splicing
12100515	alternative splicing
12102152	alternative spliced
12107069	alternative splicing
12107281	alternative splicing
12107411	alternative splicing
12110572	alternative splicing
12110731	alternative splicing
12110731	Alternative splicing
12111450	alternatively spliced
12114529	alternative splicing
12115735	alternatively spliced
12115886	alternative splicing
12117820	alternative splicing
12117992	Alternative splicing
12119100	alternative splicing
12122048	alternative splicing
12122051	alternative splice-site
12122051	alternative splicing
12123796	alternative splicing
12123807	alternatively spliced
12124432	alternative splicing
12124434	alternatively spliced
12127069	alternatively spliced
12127832	alternatively spliced
12127832	alternatively spliced
12131349	alternative splicing
12132591	alternative splicing
12133520	alternative splicing
12133520	alternative splicing
12134624	alternative splicing
12135752	alternatively spliced
12135897	alternative splicing
12136339	alternatively spliced
12137750	alternative splicing
12137938	alternative splicing
12138111	alternative splicing
12139740	alternative splicing
12140320	alternative splicing
12141424	alternate splicing
12141933	alternative splicing
12144527	alternative splice
12151098	alternative splicing
12153520	alternatively spliced
12154086	alternatively spliced
12154121	cis-alternative splicing
12163020	alternatively spliced
12169269	alternative splicing
12169693	alternative splicing
12172852	alternative splicing
12174878	alternatively spliced
12175496	alternative splicing
12176011	alternatively spliced
12176936	alternative splicing
12176936	alternative splicing
12176936	alternative splicing
12176936	alternative splicing
12176936	alternatively spliced
12176976	Alternative splicing
12176976	alternative splicing
12176976	alternative splicing
12177305	alternative splicing
12180133	alternative splicing
12180268	alternative splicing
12180268	Alternative splicing
12180268	alternative splicing
12185201	alternatively spliced
12186627	alternative splicing
12188880	alternative splicing
12198124	alternative splice
12198124	Alternative splicing
12200442	alternative splicing
12200442	Alternative splicing
12200443	alternative splicing
12200488	alternative splicing
12202761	alternative splice
12202761	alternatively spliced
12202761	alternative splicing
12208659	alternatively spliced
12210087	alternatively spliced
12210746	alternate splicing
12211057	alternate splicing
12211057	alternatively spliced
12211107	alternatively spliced
12211107	alternatively spliced
12213202	alternative splicing
12213203	alternative splicing
12213731	alternatively spliced
12215230	alternatively spliced
12217875	Alternative splicing
12217902	alternative splicing
12220820	alternative splice
12221105	alternative splicing
12223213	alternatively spliced
12224755	alternate splicing
12225774	alternative splicing
12225876	alternative splicing
12230541	alternatively spliced
12232781	alternatively spliced
12235378	alternative splicing
12235378	alternatively spliced
12235808	alternative splicing
12235853	alternative splicing
12235853	alternative splicing
12235853	alternative splicing
12237121	alternative splice
12237944	alternatively spliced
12239212	alternatively spliced
12242014	alternatively spliced
12242593	alternative splicing
12243833	alternative splicing
12244573	alternative splicing
12270120	alternate splice
12297544	alternative splicing
12298192	alternative splicing
12351191	Alternative splicing
12351191	alternative splice
12351576	alternative splicing
12353638	Alternative splicing
12354282	alternatively spliced
12359334	alternative splicing
12359444	alternatively spliced
12359444	alternatively spliced
12359774	alternatively spliced
12372422	alternative splicing
12374748	alternative splicing
12376090	alternatively spliced
12376620	alternative splicing
12383262	alternative splicing
12383262	alternative splicing
12383497	alternative splicing
12384146	alternative splicing
12384284	alternative splicing
12385759	alternative splicing
12388058	alternatively spliced
12388059	alternative splicing
12388203	alternatively spliced
12389738	alternative splicing
12390800	alternative splicing
12390864	alternative splicing
12391143	Alternative splicing
12391143	alternative splicing
12393515	alternative spliced
12396007	alternative splice
12396730	alternatively spliced
12397108	alternative splicing
12401792	alternative splicing
12402980	alternative splicing
12403769	alternatively spliced
12406085	alternative splicing
12406576	alternatively spliced
12407180	alternatively spliced
12407184	alternative splicing
12407184	alternatively spliced
12408801	alternatively spliced
12408971	alternative splicing
12408972	alternatively spliced
12408972	alternatively spliced
12412013	alternative splicing
12414516	alternative splicing
12417015	alternative splicing
12419357	alternatively spliced
12420294	Alternative splicing
12421814	alternative splicing
12422020	alternative splicing
12426321	alternatively spliced
12426321	alternatively spliced
12426321	alternatively spliced
12426469	alternative splicing
12427542	alternatively spliced
12427550	alternative splicing
12429136	alternative splicing
12429384	alternatively spliced
12431731	alternatively spliced
12431731	alternative splicing
12431847	alternative splicing
12433657	alternative splicing
12436254	alternative splicing
12437989	alternative splicing
12437989	alternative spliced
12438268	alternatively spliced
12438710	alternative splicing
12438710	alternative splicing
12440576	alternative splicing
12440928	alternatively spliced
12441665	alternatively spliced
12445822	Alternative splicing
12454013	alternative splicing
12454985	alternative splicing
12456061	alternative splicing
12456510	alternative splice
12461694	alternative splicing
12464619	alternatively spliced
12466113	Alternative splicing
12466287	alternative splice
12467339	alternatively spliced
12470476	alternatively spliced
12470668	Alternative splicing
12473450	alternative splicing
12475981	alternative splicing
12478298	alternative splicing
12479474	alternatively spliced
12481096	alternatively spliced
12481273	alternative splicing
12482604	alternatively spliced
12482864	alternative splicing
12483690	alternative splicing
12485467	alternative splicing
12488558	alternative splicing
12488558	alternative splicing
12489164	alternatively spliced
12489164	alternatively spliced
12490161	alternative splicing
12492399	alternatively spliced
12495938	alternative splicing
12500272	Alternative splicing
12500903	alternative splicing
12508274	alternative splicing
12508274	alternative splicing
12509225	alternative splicing
12509424	alternative splicing
12509424	alternative splicing
12511970	alternative splicing
12512621	alternatively spliced
12512621	alternative splicing
12515380	alternative splicing
12515753	alternatively spliced
12519958	alternative splice
12524348	alternatively spliced
12524529	alternative splicing
12524529	alternative splicing
12526022	alternatively spliced
12526033	alternatively spliced
12526033	alternatively spliced
12527191	alternative spliced
12527191	alternative spliced
12527192	alternative splicing
12527192	alternative splicing
12527199	alternative splicing
12527301	alternative splicing
12527419	alternative splicing
12527427	alternatively spliced
12527427	alternatively spliced
12527432	alternatively spliced
12527895	alternatively spliced
12527931	Alternative splicing
12530068	alternatively spliced
12531473	alternative splicing
12532266	alternate splicing
12533406	alternative splicing
12533698	alternative splicing
12537572	alternatively spliced
12538665	alternatively spliced
12539228	alternatively spliced
12549979	alternative splicing
12553932	Alternate splicing
12554864	alternative splicing
12555814	alternative splicing
12560505	alternative splicing
12560505	alternative splicing
12562527	alternative splicing
12565834	alternative splicing
12566310	alternative splicing
12566310	alternative splicing
12566310	alternative splicing
12566310	alternative splicing
12567489	alternative splicing
12567489	alternative splicing
12567489	alternative splicing
12567489	alternative splicing
12568720	alternative splicing
12568720	alternative splicing
12569366	alternative splicing
12571424	alternative splicing
12572661	alternate splicing
12573262	Alternate splice
12573262	alternate splicing
12573541	alternatively spliced
12574126	Alternative splicing
12574126	alternative splicing
12574126	alternative splicing
12574169	alternate splicing
12578378	alternative splicing
12578833	alternative splicing
12578833	alternative splicing
12581152	alternatively spliced
12581862	alternative splicing
12582166	alternative splice
12584191	alternative splicing
12586784	alternative splice
12586880	Alternative splicing
12586880	alternatively spliced
12586880	alternatively spliced
12590969	alternative splicing
12591176	alternative splicing
12591615	alternatively spliced
12593850	alternative splicing
12593850	alternative splicing
12594045	alternative splicing
12594222	alternative splicing
12595504	alternative splice
12596577	alternative splicing
12598334	alternative splicing
12598616	alternative splicing
12598685	alternative splicing
12600311	alternative splicing
12601703	alternatively spliced
12602882	alternative splicing
12604709	alternatively spliced
12606261	alternatively spliced
12609689	alternatively spliced
12614648	alternative splicing
12614648	alternative splicing
12615332	alternative splicing
12617837	alternatively spliced
12621054	alternatively spliced
12621054	alternatively spliced
12624760	alternative splicing
12624760	alternative splicing
12626565	alternately spliced
12628928	Alternative splicing
12633499	alternative splicing
12637508	alternative splicing
12637793	alternative splicing
12640141	alternative splicing
12641778	alternative splicing
12642665	alternative splicing
12642665	alternative splicing
12642867	alternative splice
12644830	alternative splice
12646181	alternate splicing
12646192	alternative splicing
12646414	alternative splicing
12646561	Alternative splicing
12649279	alternative splicing
12649279	alternative splicing
12650944	alternatively spliced
12653254	alternative splicing
[truncated: 6,575 more rows]
