# Supplementary material for: Extraction of Transcript Diversity from Scientific Literature
Source: PLoS Comput Biol. 2005 Jun 24;1(1):e10. doi: 10.1371/journal.pcbi.0010010 (PMC1183516; doi:10.1371/journal.pcbi.0010010)
Supplement: Table S4 — (76 KB XLS). [file pcbi.0010010.st004.xls]

## Sheet: Sheet1
pubmed id	mechanism
10068441	alternative promoter
10084611	alternative promoters
10084611	alternative promoter
10409212	alternative promoters
10409660	alternative promoter
10409674	alternative promoter
10447594	alternative promoter
10452946	alternative promoter
10469137	Alternative promoters
10509813	alternative promoters
10510291	alternative promoters
10524209	alternative promoters
10564828	alternate promoter
10570192	alternative promoter
10602991	alternative promoters
10608866	alternative promoter
10644678	alternative promoters
10681594	alternative promoter
10713103	alternative promoters
10744751	alternative promoters
10760582	alternative promoters
10788609	alternative promoters
10841548	Alternative promoters
10843806	alternative promoter
10858455	alternative promoters
10859489	alternative promoter
10965054	alternative promoters
10987818	alternative promoters
11000266	alternative promoter
11004497	alternative promoters
11006093	alternate promoter
11027829	alternative promoters
11042511	alternative promoters
11054557	alternative promoters
11072069	alternative promoters
11072069	alternative promoter
11087997	alternative promoters
11090272	alternate promoters
11110780	alternative promoter
11171976	alternative promoters
11177569	alternative promoters
11177569	alternative promoters
11179679	alternative promoter
11193604	alternative promoters
11245975	alternative promoter
11248705	alternative promoter
11250105	alternative promoters
11313019	alternative promoter
11327714	alternative promoters
11339836	alternative promoter
11340574	alternative promoter
11341333	alternative promoters
11352569	alternative promoter
11410370	alternative promoter
11437649	alternative promoter
11526196	alternate promoter
11550219	alternative promoters
11550795	alternative promoter
11595162	alternative promoter
11595834	alternative promoter
11675014	alternative promoter
11687277	Alternative promoters
11714890	alternate promoters
11723240	alternative promoters
11800888	alternative promoter
11839584	alternate promoter
11846397	alternative promoters
11944995	alternative promoter
11948181	alternative promoter
11955610	alternative promoters
11970965	alternative promoter
12020819	alternative promoter
12056842	alternative promoters
12059785	alternative promoter
12138111	alternative promoter
12176732	alternate promoter
12209604	alternative promoter
12393599	alternative promoter
12393864	alternate promoters
12408967	alternative promoters
12419906	alternative promoter
12420299	alternative promoter
12429992	alternative promoter
12551913	alternative promoter
12566409	alternative promoters
12624109	alternative promoter
12720534	alternative promoter
12824364	alternative promoters
12837292	alternative promoter
12943674	alternative promoter
1322527	alternative promoter
1421748	alternative promoter
1472069	alternative promoter
1531087	alternate promoter
1560021	alternative promoter
1621094	alternative promoters
1693186	alternative promoters
1716359	alternative promoter
1728594	alternative promoters
1730664	alternative promoter
1748294	alternative promoters
1770479	alternate promoter
1846662	alternative promoters
1924334	alternative promoter
1924334	alternative promoters
1957458	alternative promoters
1971215	alternative promoters
1983783	alternate promoters
1996328	alternative promoter
2022655	alternate promoters
2026327	alternative promoters
2039500	alternative promoters
2039500	alternative promoters
2057364	alternative promoter
2104660	alternative promoters
2111318	Alternative promoter
2117521	alternative promoter
2117521	alternative promoters
2119255	alternate promoter
2133653	alternative promoter
2152119	Alternative promoters
2152119	alternative promoters
2320008	alternative promoters
2345177	alternative promoters
2450521	Alternative promoters
2454231	alternate promoters
2454862	alternative promoter
2461560	alternative promoters
2549716	alternative promoters
2550428	alternate promoter
2573835	alternative promoters
2779573	alternate promoters
2833620	Alternative promoters
3029037	alternative promoters
3181637	Alternative promoter
3190083	alternate promoter
3390435	alternate promoters
3478687	alternate promoter
6092382	alternative promoter
6698320	alternative promoters
7038684	alternative promoter
7496400	alternative promoters
7496400	alternative promoter
7498474	alternative promoter
7523376	alternative promoter
7533902	alternate promoter
7535274	alternative promoter
7541708	alternative promoter
7546295	alternative promoters
7556072	alternative promoters
7595477	alternative promoters
7607551	alternate promoters
7644514	alternative promoter
7665165	alternate promoter
7669584	Alternative promoter
7679509	alternative promoter
7686253	alternate promoter
7690033	alternative promoter
7690033	alternative promoters
7744033	alternative promoters
7756176	alternate promoters
7788722	alternative promoters
7795584	alternative promoter
7799965	alternative promoter
7814380	alternative promoters
7864227	alternate promoters
7874190	alternative promoter
7949202	alternative promoter
7958853	alternative promoters
7972123	alternative promoters
7984425	Alternative promoter
7989490	alternative promoter
8130373	alternative promoters
8131748	Alternative promoter
8138155	alternative promoters
8168530	alternative promoter
8176212	alternative promoters
8246938	alternative promoters
8265819	alternate promoter
8268721	alternative promoter
8343976	alternative promoters
8365547	alternative promoter
8382597	alternate promoter
8413309	alternative promoters
8436958	alternative promoter
8456965	alternative promoter
8479292	alternative promoters
8493894	alternative promoter
8513896	alternative promoter
8522946	alternative promoter
8523124	alternative promoter
8524307	alternative promoter
8541493	alternative promoters
8543574	alternative promoter
8557707	alternative promoter
8562454	alternative promoters
8592937	alternate promoter
8601644	alternative promoters
8601644	alternative promoters
8618961	alternative promoters
8626808	alternative promoters
8631828	alternative promoters
8647344	alternative promoters
8647344	Alternative promoter
8756433	alternative promoters
8763794	alternative promoters
8769124	alternative promoter
8769124	alternative promoter
8793870	Alternate promoters
8835227	alternative promoters
8838320	alternative promoters
8855951	alternative promoters
8870124	alternative promoters
8871783	alternative promoter
8873760	alternative promoter
8886595	Alternative promoters
8924211	alternate promoters
8954572	alternative promoters
8955667	alternate promoters
8961265	alternative promoters
8995417	alternative promoters
8996106	alternative promoters
9034163	alternative promoter
9075739	alternate promoters
9125041	alternative promoters
9149133	alternative promoter
9182559	alternative promoter
9205108	alternative promoter
9238850	alternative promoter
9252365	Alternate promoters
9282912	alternative promoters
9291134	alternative promoters
9356480	alternative promoters
9396733	alternative promoters
9396734	alternative promoters
9405401	alternative promoters
9409207	alternative promoters
9430667	alternate promoter
9458871	Alternative promoters
9458871	alternative promoters
9511766	alternative promoters
9539108	alternate promoter
9546364	alternate promoters
9597751	alternative promoter
9628332	alternative promoters
9654128	alternative promoters
9687288	alternate promoter
9721211	alternate promoters
9746342	alternative promoter
9753327	alternate promoter
9757029	alternate promoter
9757029	Alternate promoter
9778035	alternative promoter
9778035	alternative promoter
9786914	alternative promoter
9829822	alternative promoter
9852109	alternate promoters
9932430	alternative promoter
9973254	alternative promoter
10198159	alternative TATA-less promoters
10343287	alternative upstream promoter
10344731	alternative downstream promoter
11073960	alternative TATA-less promoter
11351283	alternatively used promoters
11502211	alternative tissue-specific promoters
11687277	alternative neurospecific promoters
11721693	alternative upstream promoter
11970965	an alternative GATA-3 promoter
12409289	Alternative core promoters
8252624	alternative intronic promoter
8622675	alternative upstream promoter
9601686	alternative multiple promoters
9790752	an alternative MTGR1 promoter/5 '
9914492	alternative downstream promoter
9971778	alternative EBNA-1 promoters
10084611	different promoters
10190276	independent promoters
10200312	unique promoters
10215605	three promoters
10369873	their promoters
10417309	two promoters
10438937	Two promoters
10442293	several promoters
10460827	three tissue-specific promoters
10495287	two promoters
10509249	three different promoters
10517603	the katG promoters
10518018	tissue specific promoters
10523842	different promoters
10527420	plant mitochondrial promoters
10537036	two promoters
10698188	two promoters
10709921	multiple promoters
10713061	two promoters
10788794	two promoters
10833668	various promoters
10842077	two distinct promoters
10860825	at least two separate promoters
10882235	tissue-specific promoters
10895161	the upstream Cp/Wp promoters
10917596	two regulated promoters
10926776	multiple enhancers and promoters
10956665	separate promoters
10966485	two promoters
10978326	these promoters
10987818	multiple promoters
10998176	three new promoters
11004178	sigma -NONE- promoters
11089521	two additional promoters
11118620	two promoters
11139503	different promoters
11162444	at least four promoters
11171574	Three putative promoters
11175337	four distinct tissue-specific promoters
11250924	two distinct promoters
11252173	TATA-less promoters
11254714	Two novel epididymis-specific promoters
11256112	different estrogen-induced promoters
11271425	Four potential promoters
11278455	several promoters
11309512	separate promoters
11342109	the several promoters
11457862	two potential promoters
11585919	these promoters
11668679	two distinct promoters
11717463	two physically distinct promoters
11728451	different promoters
11818340	IRF-1 promoters
11893526	tissue-specific promoters
11929836	tissue selective promoters
12019239	promoters from a single gene
12030384	the five distinct promoters
12036954	two promoters
12048208	two distinct promoters
12059785	at least four different promoters
12114522	gene promoters
12147702	multiple promoters
12150546	multiple promoters
12200230	three different promoters
12358753	multiple promoters
12408967	their associated promoters
12427937	two transcriptional promoters
12522012	strong transcriptional promoters
12538735	promoters and distinct elements
12554761	multiple promoters
12624180	different promoters
12673052	gene promoters 1A and 1C
12673052	promoters 1A and 1C
12673052	the differential usage of PRL-R gene promoters
12697672	promoters P1 and P2
12767005	nuclear antigen ( EBNA ) promoters
12811835	multiple promoters
12819198	Distinct promoters
12843408	different promoters
12878222	three promoters
12907316	promoters that generate four transcript forms
12917634	promoters that can generate mRNAs with shorter 5 ' - UTRs
1307251	different promoters
1331531	mutually exclusive promoters
1334013	different promoters
1354840	separate liver and islet promoters
1376319	different promoters
1382588	multiple promoters
1400462	Over 90 % of transcripts were directed by promoter 1 , the more 5 ' of the two IGF-I gene promoters
1447141	These promoters
1479885	minor amounts of larger transcripts , possibly initiated at upstream glp promoters ,
1511800	tissue-specific promoters
1527060	Three promoters
1712760	the distinct promoters
1716725	the promoters for the two transcripts
1722620	three different promoters
1730773	two promoters
1822776	Brain-type and muscle-type promoters
1840524	the two promoters
1840706	Two promoters
1846599	two promoters
1868896	two promoters
1904443	two distinct mtr transcripts and their corresponding promoters
1908614	the promoters
1909328	two promoters
1918168	the two lck promoters
1985949	two promoters
2022655	two promoters
2032026	these promoters
2037597	the promoters
2046552	two promoters
2111016	Two differentially regulated bvg promoters
2201777	three promoters
2325649	two promoters
2405393	`` TATA-less '' promoters
2406613	different promoters
2435704	Two potential promoters
2438416	two promoters
2460747	two distinct promoters
2476669	at least two distinct promoters
2509462	two different promoters
2536113	different promoters
2543387	multiple promoters
2544423	two independent promoters
2547970	two promoters
2566999	two promoters
2571923	two tissue-specific promoters
2573615	two putative promoters
2644225	Three promoters
2648158	distinct promoters
2682629	distinct tissue-specific promoters
2744490	these different promoters
2846287	two promoters
2850479	two distinct promoters
2879223	two promoters
2882428	Four distinct promoters
2903048	two promoters
2909892	different promoters
2917697	two promoters
3009105	upstream structural gene promoters
3023383	two distinct promoters
3023634	diverging promoters
3123179	differential transcription from tandem promoters
3168158	three independent transcriptional promoters
3172226	promoters PL and PR
3211152	two promoters
3240859	two different promoters
3259318	tissue-specific promoters
3283651	separate promoters
3283651	two transcriptional promoters
3315851	at least three promoters
4022770	two distinct promoters
6094471	one minor and two major promoters
6094471	the two major promoters
6193278	the two rrnA promoters
6203743	the late promoters
6205412	two promoters
6261240	independent promoters
6294468	the promoters of these transcripts
6325390	the promoters preceding it
6329723	two promoters for the dnaA gene
6494906	two active myc promoters
7495499	three promoters
7499213	two promoters
7499430	the gene promoters
7509063	two promoters
7549484	two promoters
7557459	two different promoters
7581491	these multiple promoters
7602761	several promoters
7602849	two distinct promoters
7615541	the two promoters
7626451	tissue-specific promoters
7641802	at least seven promoters
7721900	Multiple promoters
7721900	three promoters
7776980	tissue-specific promoters
7803492	the promoters
7833916	specific promoters
7844172	separate promoters
7881185	tissue-specific promoters
7891186	two different promoters
7894072	two promoters
7908229	different promoters
7908293	these two promoters
7914919	two promoters
7919195	distinct promoters
7926675	different promoters
7958103	two distinct promoters
7980403	the multiple promoters
7981221	the two promoters
7981747	At least five independent promoters
7989373	The dual promoters
8021506	two distinct promoters
8022273	two promoters
8025713	multiple promoters
8099842	three separate promoters
8110831	two promoters
8138829	muscle-type promoters
8145766	two promoters
8216274	closely related promoters
8276818	Upstream exons and additional promoters
8311465	multiple promoters
8312393	multiple promoters
8366036	Potential promoters
8415610	factor promoters
8461137	Multiple promoters
8476746	these promoters
8507180	multiple promoters
8510223	promoters , P1 and P2
8510223	the two promoters
8557040	IgH germline transcript promoters
8566779	different promoters
8603036	tissue-specific promoters
8611627	three tandem promoters
8619869	two functionally independent promoters
8625910	promoters 1 and 2
8626590	multiple promoters
8738140	distinct promoters
8753813	two promoters
8755885	independent promoters
8786223	at least two different promoters
8801416	three promoters
8809197	multiple promoters
8809197	multiple untranslated first exons and promoters
8835227	these two promoters
8921837	two distinct promoters
8923003	two other promoters
8955306	mRNA processing and multiple promoters
8955667	the two promoters
8977401	two distinct promoters
9013956	different promoters
9020170	three different promoters
9034163	these various promoters
9045693	distinct promoters
9063895	two tissue-specific promoters
9099852	three promoters
9126170	seven separate promoters
9161403	two different promoters
9172679	human promoters
9184229	different promoters
9184229	multiple promoters
9210478	two different promoters
9231771	tissue-specific promoters
9252362	two promoters
9278162	two functionally independent promoters
9315680	Transcriptional initiation from two different promoters
9368018	unique promoters
9376317	two distinct promoters
9443073	metallothionein isoform promoters
9499410	internal promoters
9545342	tissue-specific promoters
9596762	three distinct promoters
9602167	multiple promoters
9620882	multiple promoters
9620882	separate promoters
9683487	sigma70 promoters
9695021	two promoters
9710756	at least two different gene promoters that generate two variants with different exon 1 sequences ( 1A and 1B )
9720575	closely linked but separate promoters
9736652	the two downstream promoters
9751164	six promoters
9757065	other promoters
9758708	different promoters
9761722	two separate promoters
9764825	two independent promoters
9774662	separate promoters
9791129	dominated and its three promoters
9854034	the two promoters associated with exons 1a and 1b
9860993	these two promoters
9914474	different promoters
11687578	this novel promoter
12414930	a novel promoter
12745064	a novel promoter
12875967	novel promoter regions
2571923	a novel promoter
2831399	a novel promoter
8642661	a novel promoter
9753327	a novel downstream promoter
9880515	a novel promoter
10066431	the upstream promoter
10698199	a testis-specific promoter to express a mRNA containing a unique exon located 13.5 kb upstream from the first coding exon
12151717	a distinct but related promoter upstream of each Pcdh-gamma variable exon
12819198	two distinct promoter regions , the upstream one leading to transcripts translating into cPHGPx or mPHGPx and the downstream one yielding nPHGPx
1339434	skeletal muscle-specific transcript from an upstream promoter and a liver-specific transcript from a downstream promoter
1698617	the upstream promoter
2446119	the upstream promoter region
2535734	the upstream promoter
2787474	the upstream promoter
2841106	the upstream promoter P1
2928340	a single promoter upstream
3182792	a promoter region starting 48 base pairs upstream of the major transcriptional start site
3796610	The upstream promoter domain is relatively small and extends from residues
6723496	a transcript initiated upstream from the normal promoter
7733323	a promoter region located upstream from the start of mRNA transcription
7852413	an upstream promoter
7912105	A possible upstream promoter
8083345	new promoter upstream
8226884	an upstream promoter
8574852	the upstream promoter
8977242	only the upstream promoter
9214634	an upstream promoter and additional exons
9406999	the upstream promoter
9765589	a unique upstream promoter region
9835028	identifiable promoter sequences other than the region upstream from pcbA
9854034	The upstream promoter
10491078	an additional promoter
11342105	promoter probing in the rplJ and rplL intergenic region , an additional 5 '
11489127	An additional internal constitutive promoter
12006591	an additional ST3 gene promoter
12813047	An additional promoter and two non-coding exons
2473940	An additional internal promoter
10373481	differential promoter usage
10465264	a different promoter , and a protein-coding exon ( exon V )
10594838	different promoter regions
10895161	differential promoter usage
11848263	also different placenta-specific promoter regions
12586900	a different promoter
12628468	different promoter regions
1341034	a different promoter
1400357	different promoter regions
1508221	differential promoter usage
1508221	tissue-specific differential promoter usage of the 11 beta-OHSD gene
2115123	differential promoter usage
2555438	a different promoter and has a different 5 ' exon
3018531	a different promoter region
7720671	differential promoter usage
7745684	the differentiation-dependent P742 promoter
7874083	three different promoter regions
8479291	three different promoter regions
9038352	differential promoter utilization
9746342	different potential promoter regions
10736202	a skeletal muscle-specific promoter
10913164	a fourth promoter and first exon ( exon 1A )
11555854	multiple tissue-specific promoter regions
12039059	specific STAT5B promoter
12421814	the specific promoter-mediated response
12429046	the adipocyte specific promoter aP2
1317108	specific promoter usage
1465439	the neuron-specific promoter
1577871	a downstream , erythroid-specific , promoter
2574113	a brain-specific promoter
2851721	a muscle-specific promoter
8012403	this tissue-specific promoter element
9022058	PDGFbeta r tissue-specific promoter activity
9723178	tissue-specific promoter utilization
9794473	cell-specific promoter activities
3882417	two promoter regions
6300662	both the SV40 early region promoter and two introns
8343976	two promoter regions
8370119	the promoter region and two exons , 141 bp and 89
8530508	two promoter regions
9197544	two potential promoter regions
9492038	two promoter regions
11274164	promoter selection influences the outcome of the splice process
11595176	complex splicing and close promoter proximity
8423992	promoter insertion and aberrant splicing
9731201	promoter usage and splicing events
10022757	the promoter
10075683	the P2 promoter
10086997	a promoter
10197997	a common promoter region
10218996	The gonadotropin-releasing hormone receptor gene promoter
10229654	a promoter
10230518	the proximal promoter
10323337	the receptor gene 's organization and promoter regulation
10385393	A downstream promoter
10391676	the ESX promoter region
10395916	the P1 promoter
10395916	transcripts initiated from each promoter
10424767	a promoter-switch
10430179	the erythroid ( proximal to the AUG ) and the testis ( distal to the AUG ) promoter ,
10438937	the intron 1 promoter
10448518	promoter utilization
10465286	a distinct 5 ' - UTR characteristic of transcripts derived from promoter II
10473598	6 promoter
10477599	the promoter activity
10497275	an internal promoter in intron 23 in addition to the promoter preceding exon 1
10497275	The internal promoter , which is used preferentially in cultured chondrocytes ,
10499530	IGF-I receptor promoter activity
10511565	a common promoter
10551867	this promoter
10570192	the promoter
10570192	The promoter
10570225	separate and distinct promoter regulatory regions
10645721	promoter activity between the coding regions of the maize homeobox gene Zmhox1a and Trap ( transposon-associated protein )
10672045	a common promoter , designated PI
10743502	multiple promoter regions
10756202	a promoter
10760179	the melAB promoter transcript start point
10816440	promoter usage
10849209	the OB-R / GRP promoter
10860851	a distal promoter
10869066	a sigma -NONE- promoter sequence
10871838	The HBV X gene promoter cis-activates chimeric
10932044	a common promoter located in the 5
10938437	the promoter region
10944527	the human LST1 gene promoter
10944527	the promoter
10966215	the promoter region
10969850	the promoter region
10978326	the minimal 1alpha promoter
10978502	a separate promoter
10998113	a promoter for the small form neurofilament gene
11071930	a common promoter
1107999	The promoter-dependent transcripts
11090425	an intronic promoter
11103776	promoter region
11112417	its only promoter
11196173	the hTERC promoter
11272725	one promoter
11290834	promoter regions
11340067	the rat GluR1 promoter
11356691	the basal promoter
11359793	the same promoter
11368914	a bidirectional promoter
11373341	variants stimulated mouse vdr promoter activity
11374870	the ibpB gene transcript starting from the sigma -NONE- - promoter
11374872	its own promoter region
11415440	TATA-less promoter
11416151	an internal promoter
11472060	the promoter of Scyd1
11472060	the Scyd1 promoter
11502211	promoter-derived variants
11502211	various promoter-derived transcripts
11530281	a promoter
11579212	Pem gene promoter
11591367	an internal promoter
11602360	the minimal promoter
11674998	the promoter regions
11676537	a similar promoter region to CeTMIII isoform
11679079	a promoter
11687277	distinct promoter elements
11689675	promoter insertion
11731232	sequential promoter usage
11848263	promoter activity
11850181	promoter usage and multiple enhancers
11880239	its promoter
11970965	the recognized promoter
11985717	the P1 promoter
12029052	the promoter and before the Omega4514 insertion
12056811	a bi-directional promoter
12056811	a distal promoter
12060763	promoter structure
12175506	Differential Pax6 promoter activity and transcript expression during forebrain development
12225873	Differential promoter usage of mouse
12296385	an independent promoter
12358730	the promoter region
12385824	both the promoter-derived transcripts
12411446	a bidirectional promoter
12414930	an active promoter
12420299	the P2 promoter
12421814	each analyzed promoter
12421814	the promoter architecture
12427542	the CBS-1b promoter
12489162	Col1a1 promoter fragments
12489194	the promoter structure
12504581	a promoter in the terminal repeat sequence
12506063	the Flt-1 promoter
12551893	the other promoter
12554750	This promoter fragment
12584573	separate promoter regions
12592704	a promoter activity
12654866	a vsp1 promoter
12670917	the CpG island promoter region
1328260	promoter activity in D. discoideum cells
1370554	a common promoter region
1376408	the T7 promoter
1400357	a highly active promoter region
1454529	the downstream L promoter
1547493	the late Sxl promoter
1596896	the LS174T cell PLAP promoter
1647072	the major promoter
1651327	a promoter
1702422	another promoter in fetal liver
1733948	the promoter responsible for the production of the 4.3-kb liver message
1748659	the spermatogenic cell promoter
1822776	The promoter of the 14 kb mRNA encoding the brain isoform of dystrophin in the mouse
1851144	potential promoter elements
1865121	depend on the promoter
1874564	metallothionein promoter-human growth hormone transgenic mice
1924334	the hypothalamic promoter
1958575	gene promoter-enhancer elements
1996328	the promoter
2111318	a previously unidentified promoter
2162768	either promoter
2164604	a promoter proximal
2168978	the promoter
2190244	Two putative promoter -35 and -10
2211498	the transcription promoter
2228963	a third promoter
2247437	the human immunodeficiency virus type 1 promoter
2251119	a unique transcriptional promoter sequence
2308161	a promoter , initiation site and first exon that is distinct from that used for both the smooth and the skeletal muscle transcripts
2308817	the P1 promoter
2368617	the distal promoter
2401405	the promoter
2425359	this promoter
2440878	the tumor promoter 12-O-tetradecanoylphorbol-13-acetate
2443706	the transcripts initiated at the major PL10 promoter
2446119	the mRNAs initiating from the major transcription promoter region
2524382	the SV40 promoter
2558057	the pomc promoter
2600977	the same promoter
2674679	the minor promoter
2725490	a cryptic intragenic promoter
2787474	the downstream promoter
2835292	promoter probe plasmids
2836709	the gidA promoter
2847413	the capsid gene promoter
2851513	a unique promoter
2914939	a unique promoter
2915904	a cryptic promoter
2983190	promoter sequences
2985142	a cryptic promoter
2993302	a single promoter
3013854	the major heavy strand promoter
3023672	the p5 promoter
3025648	The TRP1 promoter
3026891	a single gp MotA-dependent middle promoter to give a major transcript of approximately 930 nucleotides and a minor transcript of approximately 620 nucleotides
3036524	transcription initiated from the promoter proximal to pyrB
3155722	the regulated downstream promoter
3316192	this promoter
3373574	a separate internal promoter
3542569	the downstream promoter
3597432	promoter and 3 ' elements
3599180	promoter strength
3614195	the major promoter
3654663	another promoter sequence of the CAT box
3680248	promoter activity
3912173	the one promoter located at 95 %
6291589	the A promoter
6294601	a prokaryotic promoter
6312102	its own promoter
6321434	the promoter regions of the phoA and phoE genes
6425826	a promoter of transformation in mouse embryo C3H/10T1
6736040	a promoter-proximal event
7493991	the promoter utilized to produce the calspermin transcript
7495741	this promoter
7499434	promoter motifs
7523374	promoter VI
7531707	a single promoter
7538113	transcripts initiated per min per promoter
7565607	the transcript initiated from the I element promoter
7581369	a putative promoter
7590348	the murine GR cDNA , gene and promoter region
7592716	the APLP2 gene promoter
7601848	Transcription initiated at this strong promoter
7607404	a single promoter
7629110	a functional promoter
7642525	the promoter
7647037	a bidirectional promoter that produces functional transcripts in the opposite direction
7654312	the lac promoter ;
7659502	a promoter
7664680	only promoter 1 transcripts
7686253	the previously characterized testicular promoter ( P1 )
7688388	The promoter sequence and restriction map
7731686	the distal promoter
7814380	the somatic SOD-1 promoter
7828931	the promoter
7852267	choline kinases and the promoter region
7865044	a heat shock ( HS ) - inducible promoter
7892229	the promoter region
7907917	a larger promoter-regulatory complex which may influence transcription during latency
7961891	the major promoter start site
7983437	the phage T7 promoter
7984102	an unusual promoter sequence
8006022	promoter elements
8021528	this promoter
8022277	this promoter
8032684	the PPT promoter
8037467	multiple transcription initiation sites and a distinct pattern of expression in mouse testis : identification of a 5 ' - flanking sequence with promoter activity
8076823	the promoter
8092514	promoter IV
8113742	F promoter
8132667	promoter activity
8206842	transcription initiated at a single primary promoter region and that proU transcription activation
8227066	H2B promoter
8251887	MoMLV promoter
8265348	three promoter regions resulting in the generation of various mRNAs which nevertheless all encode the same protein products
8274770	an apparent sigma 70 promoter
8280056	the P2 promoter
8289367	the internal promoter
8307575	the previously published promoter for the carnitine palmitoyltransferase II gene
8382702	A strong promoter element
8391600	The promoter
8413239	transcripts initiated from the U2 gene promoter
8414980	several potential promoter/enhancer regions
8440726	these promoter domains
8453572	the major promoter 1b
8466648	The P1 promoter
8476746	a minor promoter
8493108	the promoter
8519695	the mouse mammary tumor virus promoter
8589290	promoter usage
8589688	a cryptic promoter
8611627	the exon 1b promoter
8621084	a naturally occurring variant promoter
8625910	promoter 1 - and promoter 2-initiated transcripts , especially those containing exon VII or VIII
8625924	the E1A promoter
8662720	potential promoter sites
8662786	alpha receptor gene promoter
8668945	the ie1/ie2 promoter/enhancer region
8709957	a second promoter located downstream ( P2 )
8757323	this promoter
8759753	the promoter
8763031	NOS I promoter
8794326	a promoter
8841202	the downstream promoter
8846292	the late or maintenance promoter
8876134	the ie1/ie2 promoter - enhancer
8892815	the putative promoter
8912807	beta-casein promoter activation
8923003	this promoter
8954797	at least 2 promoter regions
8996088	the identified putative promoter region
9019166	the distal promoter
9032399	a promoter within the second exon
9038101	the eIF-2 alpha promoter
9050867	Multiple promoter elements
9070924	the promoter
9111048	The downstream promoter
9131487	a promoter
9167893	the promoter regions
9195985	an early lytic cycle promoter
9224654	basal promoter activity
9259319	an internal promoter
9261099	promoter alpha
9261429	the p5 promoter of AAV
9266104	promoter usage
9281603	only the transcripts initiated from the distal promoter
9291098	a primary transcript initiated on a distal promoter on the rat GGT gene
9305903	This promoter
9305940	the SV promoter elements
9311817	the downstream S promoter
9370258	the uteroglobin promoter
9388201	dual promoter usage
9396734	this promoter
9458871	the cardiac NCX1 promoter , from which the most abundant quantities of NCX1 transcripts are expressed
9495315	This promoter
9510189	promoter characterization
9514155	a promoter
9528803	a downstream promoter
9566731	promoter utilization
9573390	the 5 ' promoter region
9580677	the TNFalpha promoter
9580677	the TNFalpha promoter site
9605856	the promoter
9614874	transcripts and promoter regions
9639557	Each promoter
9642100	promoter region
9672068	a promoter
9733806	the same promoter
9739023	the COL1A1 promoter
9753744	Initiation from the putative distal promoter
9753744	the distal promoter
9757029	promoter B
9761722	the downstream promoter
9804899	promoter usage
9804922	The p2 promoter
9823467	a second promoter
9849967	multiple promoter usage
9851999	an autoinducible TraR promoter
9858578	the respective promoter regions
9867871	the SOD1 promoter
9867871	the SOD1 proximal promoter
9878257	the promoter element
9882349	the promoter controlling
9973611	The HIV-1 promoter
9988706	the minimal promoter region of the neuronal nicotinic receptor
